1 Fatty acid profiles, cholesterol composition, and nutritional quality indices of 37 commonly  
2 consumed local foods in Kuwait in relation to cardiovascular health

3

4 Hanan A. Al-Amiri<sup>1\*</sup>, Nisar Ahmed<sup>2¶</sup>, Tahani Al-Sharrah<sup>2¶</sup>

5 <sup>1</sup> Food and Nutrition Program, Environment and Life Sciences Research Center, Kuwait  
6 Institute for Scientific Research, Shuwaikh, Kuwait

7 <sup>2</sup> Environment Pollution and Climate Program, Environment and Life Sciences Research  
8 Center, Kuwait Institute for Scientific Research, Shuwaikh, Kuwait

9

10 \* Corresponding author

11 E-mail: [hamiri@kisr.edu.kw](mailto:hamiri@kisr.edu.kw), [hanan2303@yahoo.com](mailto:hanan2303@yahoo.com)

12 ORCID ID: <https://orcid.org/0000-0002-8338-5780>

13

14

15

16 ¶These authors contributed equally to this work

17

18

19

20

21

22

23

24

25

26

27

## 28 **Abstract**

29 Dietary fatty acids and cholesterol content are proved, by many research studies, to be  
30 associated with various health conditions, including cardiovascular health. Knowledge of the  
31 composition of these nutrients in food is essential for proper planning of health programs.  
32 The present study aimed at assessing the fatty acid profile, fatty acid nutritional quality, and  
33 cholesterol composition of 37 foods commonly consumed in the State of Kuwait and the  
34 potential impact of these foods on cardiovascular risk. Fatty acid profile was determined by  
35 gas chromatography-flame ionization detector into four types: saturated, monounsaturated,  
36 polyunsaturated, and trans fatty acids. Nutritional quality was calculated using the  
37 atherogenic index, thrombogenic index, hypocholesterolemic/hypercholesterolemic fatty acid  
38 ratio, polyunsaturated fatty acid/ saturated fatty acid ratio, and n-3/n-6 fatty acids ratio.  
39 Determination of cholesterol was performed by gas chromatography. Saturated fatty acid  
40 levels ranged from 0.01–21.83, monounsaturated fatty acids 0.01–25.51, and 0.013–22.87  
41 g/100 g edible portion of food. The predominant fatty acids identified in all studied foods  
42 were C18:2c (n-3), C16:0, and C18:1c, with values 0.45–56.52, 10.12–44.90, and  
43 16.99–42.56% of total fatty acids, respectively. The trans fatty acid content was low in all  
44 foods. Cholesterol levels varied between traces (<0.05) and 454.79 mg/100 g edible portions  
45 of food. Results show that seafood, rice-based, seed-based, and vegetable-based foods had  
46 better nutritional quality in terms of the fatty acids content, as indicated by the  
47 polyunsaturated fatty acid/saturated fatty acid and n-3/n-6 ratios, low thrombogenicity indices,  
48 and high hypocholesterolemic/hypercholesterolemic fatty acid ratios. Cholesterol and fatty  
49 acid data obtained in the present study will be of special interest for many studies, including  
50 nutrition-related health research, and will help policymakers in proper strategies for health  
51 programs.

52

## 53 **Introduction**

54 Dietary intake of fatty acids and cholesterol play an important role in the etiology of  
55 cardiovascular disease (CVD) [1, 2], a leading cause of death in most countries [3].  
56 According to the World Health Organization (WHO), CVD accounts for 17.9 million deaths  
57 annually [3].

58 Several experimental and epidemiological studies have proven the strong association  
59 between specific types of dietary fatty acids and blood cholesterol levels and therefore, the  
60 risk of CVD [2, 4-8]. The degree of CVD risk may vary according to the type and level of  
61 dietary fatty acids. Dietary saturated fatty acid (SFA), trans fatty acid (TFA), and/or improper  
62 ratio of n-3/n-6 fatty acids are common dietary causes of CVD [6, 9]. Dietary SFAs elevate  
63 total and low-density lipoprotein (LDL) blood cholesterol, whereas TFAs elevate total blood  
64 cholesterol and LDL cholesterol, and lower blood high-density lipoprotein (HDL) cholesterol  
65 [9, 10]. However, dietary polyunsaturated fatty acid (PUFA) and monounsaturated fatty acid  
66 (MUFA) generally lower both total and LDL cholesterol levels, thus may cause reduction in  
67 the incidence of CVD [11, 12], and possibly the prevention of some cancers, asthma, diabetes  
68 and hypertension [13]. Additionally, a strong relationship has been revealed between cellular  
69 cholesterol levels and Alzheimer's disease [14]. Nutritional strategies to achieve a better  
70 balance of fatty acids in the diet by decreasing the intake of SFA and TFA as well as  
71 cholesterol, appear to be significant and effective to reduce the potential risk of these diseases.  
72 Thus, knowledge of the fatty acid and cholesterol composition of foods is essential before  
73 any nutritional strategy can be implemented.

74 This article aims to provide detailed data on the fatty acid profiles and nutritional quality,  
75 as well as cholesterol contents of 37 local foods commonly consumed in the State of Kuwait.  
76 This data will contribute valuable information to fatty acid and cholesterol composition tables.  
77 The enrichment of food composition tables with reliable analytical data on local foods is

78 significant for obtaining convincing results in future nutritional-health related research and in  
79 the development and implementation of nutritional policies aimed at improving health.

## 80 **Materials and methods**

### 81 **Food sampling**

82 Top thirty seven most commonly consumed local foods among Kuwaitis were selected  
83 from “Kuwait Total Diet Study” data. The selected foods included 21 foods commonly  
84 cooked and prepared at home, and 16 ready-made foods often purchased by locals rather than  
85 cooked at home. Each ready-made food was purchased from three different  
86 restaurants/confectioneries based on its popularity among Kuwaitis. The most common  
87 brands of cream cheese spread (four brands), triangle processed cheese (three brands), and  
88 white cheese low fat (one brand “Al-Wafra”) were purchased from retailers.

89 As for cooked foods, data on the ingredients, their quantities, and cooking procedures  
90 were collected based on a field survey of 250 Kuwaiti households. The food recipes were  
91 standardized by identifying the foremost ingredients of each recipe and their weight ratio  
92 from the total, ensuring that the coefficient of variation (CV) did not exceed 20%. Details on  
93 the major ingredients of the 37 foods are given in S1 Table.

94 The cooked foods were prepared at the Ministry of Health (MOH) kitchen based on the  
95 standardized recipes under the supervision of experienced Kuwaiti cooks. All ingredients  
96 including water were weighed, and three identical preparations of each food were cooked  
97 separately. Foods were cleared of inedible parts, if any, including bones and skin. Each  
98 cooked and ready-made food was then homogenized thoroughly in a blender and sampled for  
99 moisture analysis. The remaining food sample was dried in a freeze drier (VirTis, Unitop  
100 800L, USA), ground, transferred into airtight bottle containers, labeled, and stored in a deep  
101 freezer at -18°C until analysis.

## 102 **Fatty acid analysis**

103 Total fat content in g/100 g edible portion (EP) of food was determined gravimetrically  
104 following Soxhlet extraction (Tecator Soxtec system, HT 1043 extraction unit, Herndon, VA,  
105 USA) according to the method given in AOAC [15]. Fatty acids were extracted from each  
106 sample in triplicate according to Folch, Lees, and Sloane Stanley [16] with a modification by  
107 Segura and Lopez-Bote [17]. Briefly, 0.5 g of freeze dried food sample was homogenized  
108 with 20 ml chloroform:methanol (2:1 v/v) solution. The samples were ultrasonicated at room  
109 temperature for 15 min. After allowing to settle for a few minutes, the homogenate was  
110 filtered. The filtrate was collected in a tube and NaCl solution was added. The tube  
111 centrifuged for 20 min at approximately 3000 x rpm. The upper layer of methanol:water was  
112 removed, and the lower layer was filtered through anhydrous sodium sulphate and collected  
113 in a volumetric flask. The solvent was evaporated under nitrogen, the residual fat was  
114 esterified, and methyl esters of fatty acids (FAME) were prepared as described by the  
115 American Oil Chemists' Society (AOCS) Official Method Ce 2-66 [18]. A 0.5  $\mu$ L esterified  
116 sample was injected into a gas chromatograph (GC) (Agilent 6890 Series, Agilent  
117 Technologies, Palo Alto, CA, USA) coupled with a flame ionization detector (FID). A  
118 cyano-polysiloxane (CP-Sil 88 for FAME, part number CP7489) capillary column (100 m  $\times$   
119 0.25 mm, 0.20  $\mu$ m; Agilent Technologies, Palo Alto, CA, USA) was used for the FAMEs  
120 separation under the following instrumental conditions: injector and FID detector  
121 temperatures were 260 and 270 $^{\circ}$ C, respectively, with injector split ratio of 1:50, and carrier  
122 gas helium with a constant flow rate of 1.0 mL/min. The initial oven temperature was 80  $^{\circ}$ C,  
123 at which it was held for 5 min, followed by an increase to 220  $^{\circ}$ C at a rate of 4  $^{\circ}$ C/min then  
124 was held for 5 min, and finally the temperature was increased to 240  $^{\circ}$ C at a rate of 1  $^{\circ}$ C/min  
125 and was held for 10 min. A 37-component FAMEs standard mixture was used to identify the  
126 fatty acids, the mixture contained FAMEs ranging from C4:0 to C22:6. The FAMEs were

127 identified by comparing the retention times of standard peaks with the retention times of  
128 sample peaks. The quantification of the fatty acids was performed by the conversion of the  
129 peak areas in percentage of the extract using a GC Workstation software. The fatty acid  
130 content was reported as percentage of the total fatty acids. In order to compile data in food  
131 composition tables, fatty acid data need to be transformed to per 100 g EP on fresh weight  
132 basis, to create internationally interchangeable food composition data. The fatty acid  
133 composition in g/100 g EP was calculated from the corresponding fatty acid (percentage of  
134 total fatty acids), following the method described by Paul and Southgate [19].

### 135 **Cholesterol analysis**

136 Cholesterol was analyzed in triplicate via GC (Agilent 6890 Series, Agilent Technologies,  
137 Palo Alto, CA, USA) according to a method described by Naeemi et al. [20]. Each sample  
138 was spiked with the internal standard 5- $\alpha$ -cholestane after saponification with a saturated  
139 methanolic KOH solution; hexane was then added, centrifuged at 2000 rpm for 2 min, and  
140 finally 0.5  $\mu$ L of the upper layer was injected into the GC for cholesterol analysis.

141 The GC conditions used in this study were as follows: injector and detector temperatures  
142 were 300°C, with injector split ratio of 1:25, and carrier gas helium with flow rate of 1.0  
143 mL/min. The initial oven temperature was 250 °C, the holding time was 2 min, and the  
144 temperature rise rate was 3 °C/min.

### 145 **Fatty acid quality**

146 Fatty acid quality was determined using the atherogenic index (AI) and thrombogenic  
147 index (TI) according to Ulbricht & Southgate [21]. The hypocholesterolemic to  
148 hypercholesterolemic (H/H) fatty acid ratio index which considers the specific effects of fatty  
149 acids on cholesterol metabolism, was determined as described by Testi et al. [22]. The indices  
150 were calculated using the following equations:

$$151 \text{ AI} = [(\text{C12:0} + (4 \times \text{C14:0}) + \text{C16:0})] / (\sum \text{MUFA} + \sum \text{n-6} + \sum \text{n-3})$$

152  $TI = (C14:0 + C16:0 + C18:0) / [(0.5 \times \sum MUFA) + (0.5 \times \sum n-6) + (3 \times \sum n-3) + (\sum n-3 / \sum n-6)]$

153  $H/H = (C18:1c + C18:2n-6 + C20:4n-6 + C18:3n-3 + C20:5n-3 + C22:5n-3 + C22:6$

154  $n-3) / (C14:0 + C16:0)$

155 where:

156  $\sum MUFA$  = sum of monounsaturated fatty acids,

157  $\sum n-6$  = sum of n-6 fatty acids, and

158  $\sum n-3$  = sum of n-3 fatty acids.

159 Further indices were calculated as PUFA to SFA (P/S) ratio, and n-3/n-6 fatty acids ratio.

## 160 **Statistical analysis**

161 Each food sample was analyzed in triplicate for total lipid, fatty acid, and cholesterol  
162 composition. Fatty acid data were reported as the mean value on the wet weight of the edible  
163 portion of food in g/100 g, and as percentage of the total fatty acids. Cholesterol data were  
164 reported as the mean  $\pm$  standard deviation (SD) in mg/100 g EP of food. The minimum and  
165 maximum values for each fatty acid and cholesterol content were interpreted as a measure of  
166 range.

## 167 **Results and discussion**

### 168 **Fatty acid profile**

169 Investigated foods in the current study were classified into nine categories: seafood (n=3),  
170 soup (n=3), cheese (n=3), rice-based (n=6), desserts (n=11), seed-based (n=2), meat-based  
171 (n=4), sandwiches (n=2), and vegetable-based (n=3) (Table 1). The classification of the foods  
172 is based on major ingredients in each recipe, as well as the common classification (i.e. cheese,  
173 soup, desserts, and sandwiches). All cheese, desserts (except *Khabeesa* “cooked semolina  
174 with oil and sugar” and *Aseeda* “cooked wheat flour with sugar”), sandwiches, one  
175 meat-based food (*Arayes* “pita bread stuffed with minced lamb”), and one seed-based food

176 (*Harda* “soft sesame butter, tahini”) were ready-made and purchased from the most popular  
177 restaurants and bakeries/confectioneries. The detected fatty acids were classified into four  
178 types: SFA, MUFA, PUFA, and TFA. The fatty acid compositions were expressed both as  
179 g/100 g EP and as % of the total fatty acids.

## 180 **Saturated fatty acids**

181 SFA was the most dominant type of fatty acids among analyzed foods (Fig 1). The SFA  
182 content was observed with values ranged from 0.01 to 21.85 g/100 g EP (S2 Table). The  
183 highest range of SFA content (8.32–21.85 g/100 g EP) and percentage of total fatty acids  
184 (62.27–67.33%) was found in cheese. Meat-based foods and sandwiches showed high levels  
185 of SFA ranged from 40.65 to 52.09, and 39.43 to 44.91% of total fatty acids, respectively.  
186 *Knafah* (shredded phyllo dough and cheese in sugar syrup) and *Gherayba* (shortbread cookie)  
187 showed high SFA concentrations of 10.96 and 15.95 g/100 g EP, respectively, and high SFA  
188 percentage of total fatty acids of 62.92 and 59.98%, respectively (S2 Table and Table 1). The  
189 high SFA content of the dessert *Gherayba* is attributed to the use of ghee in the recipe and to  
190 the use of cheese and butter in *Knafah*.

191

192 **Fig 1. Concentrations in g/100 g edible portion of food: SFA (saturated fatty acid);**  
193 **MUFA (monounsaturated fatty acid); PUFA (polyunsaturated fatty acid); TFA (trans**  
194 **fatty acid); of 37 commonly consumed local foods in Kuwait.** SFA was the most dominant  
195 type of fatty acids among foods, while TFA was found in very little amounts.



196 Table 1. Fatty acid composition profile on the wet weight of the edible portion (percentage of the total fatty acids) for 37 commonly consumed local foods in  
 197 the State of Kuwait

| Food                                                                | Saturated Fatty Acid (SFA) |     |      |      |      |       |      |       |      |       |      |      |      |      | ΣSFA |              |
|---------------------------------------------------------------------|----------------------------|-----|------|------|------|-------|------|-------|------|-------|------|------|------|------|------|--------------|
|                                                                     | 4:0                        | 6:0 | 10:0 | 12:0 | 13:0 | 14:0  | 15:0 | 16:0  | 17:0 | 18:0  | 20:0 | 21:0 | 22:0 | 23:0 |      | 24:0         |
| <b>Seafood</b>                                                      |                            |     |      |      |      |       |      |       |      |       |      |      |      |      |      |              |
| <i>Marag Samak Maleh</i> (Spanish mackerel broth)                   | tr                         | tr  | tr   | tr   | tr   | 3.26  | 0.63 | 23.15 | 0.70 | 6.26  | 0.40 | tr   | tr   | tr   | tr   | <b>34.41</b> |
| <i>Kabab Rubyan</i> (Shrimps kebab)                                 | tr                         | tr  | tr   | tr   | tr   | 1.20  | 0.37 | 18.40 | 0.77 | 5.84  | 0.40 | tr   | tr   | tr   | 4.74 | <b>31.72</b> |
| <i>Marag Rubyan</i> (Shrimps broth)                                 | tr                         | tr  | tr   | tr   | tr   | 0.26  | 0.17 | 13.25 | 0.42 | 3.49  | 0.44 | 0.05 | 0.06 | tr   | 0.17 | <b>18.32</b> |
| <b>Soup</b>                                                         |                            |     |      |      |      |       |      |       |      |       |      |      |      |      |      |              |
| <i>Shorbat Shaereya</i> (Vermicelli soup)                           | tr                         | tr  | tr   | tr   | tr   | 1.77  | tr   | 18.10 | tr   | 3.52  | tr   | tr   | tr   | 6.09 | 0.09 | <b>29.57</b> |
| <i>Shorbat Dajaj</i> (Chicken soup)                                 | tr                         | tr  | tr   | tr   | 0.08 | 6.71  | 0.67 | 30.55 | 0.35 | 9.87  | 0.12 | tr   | 0.16 | tr   | tr   | <b>48.50</b> |
| <i>Shorbat Harees</i> (Soup of peeled wheat with lamb)              | tr                         | tr  | tr   | tr   | tr   | 2.05  | 0.79 | 24.56 | 1.86 | 28.19 | 0.27 | 0.13 | tr   | tr   | tr   | <b>57.86</b> |
| <b>Cheese</b>                                                       |                            |     |      |      |      |       |      |       |      |       |      |      |      |      |      |              |
| Cream Cheese Spread, Regular                                        | tr                         | tr  | tr   | tr   | 0.10 | 13.11 | 1.47 | 36.91 | 0.40 | 14.88 | 0.21 | tr   | tr   | tr   | tr   | <b>67.08</b> |
| Triangle Processed Cheese                                           | tr                         | tr  | tr   | tr   | 0.20 | 13.58 | 0.99 | 37.58 | 0.43 | 14.11 | 0.25 | 0.06 | 0.08 | tr   | 0.05 | <b>67.33</b> |
| “Al-Wafra” White Cheese, Low Fat                                    | tr                         | tr  | tr   | tr   | tr   | 10.70 | 1.10 | 36.90 | 1.13 | 12.43 | tr   | tr   | tr   | tr   | tr   | <b>62.27</b> |
| <b>Rice-based</b>                                                   |                            |     |      |      |      |       |      |       |      |       |      |      |      |      |      |              |
| <i>Aish Muhammad</i> (Sweet rice)                                   | tr                         | tr  | tr   | tr   | tr   | tr    | tr   | 12.71 | tr   | 2.61  | 0.56 | tr   | tr   | tr   | tr   | <b>15.88</b> |
| <i>Aish Khothra</i> (Rice with vegetables)                          | tr                         | tr  | tr   | tr   | tr   | 0.09  | tr   | 11.86 | 0.10 | 2.26  | 0.46 | 0.08 | 0.16 | tr   | 0.09 | <b>15.09</b> |
| <i>Aish Fagae ma Laham</i> (Rice, truffle with lamb)                | tr                         | tr  | tr   | tr   | tr   | 0.24  | 0.08 | 14.16 | 0.33 | 5.42  | 0.62 | 0.10 | 0.26 | tr   | 0.17 | <b>21.39</b> |
| <i>Aish Bajella ma Shbent</i> (Rice with green fava beans and dill) | tr                         | tr  | tr   | tr   | tr   | 0.11  | tr   | 13.31 | 0.12 | 2.47  | 0.59 | tr   | tr   | tr   | 0.10 | <b>16.69</b> |
| <i>Aish Tomat</i> (Rice with tomato)                                | tr                         | tr  | tr   | tr   | tr   | tr    | 3.30 | 28.96 | tr   | 5.90  | tr   | tr   | tr   | tr   | tr   | <b>38.15</b> |
| <i>Kushari</i> (Rice with macaroni and mung beans)                  | tr                         | tr  | tr   | tr   | tr   | 8.13  | tr   | 12.10 | tr   | 9.08  | tr   | tr   | tr   | tr   | 6.89 | <b>36.20</b> |
| <b>Desserts</b>                                                     |                            |     |      |      |      |       |      |       |      |       |      |      |      |      |      |              |
| <i>Gherayba</i> (Shortbread cookie)                                 | tr                         | tr  | tr   | tr   | 0.07 | 8.17  | 0.89 | 41.24 | 0.08 | 9.03  | 0.34 | tr   | 0.04 | tr   | 0.05 | <b>59.90</b> |
| <i>Knafah</i> (Shredded phyllo dough and cheese in sugar syrup)     | tr                         | tr  | tr   | tr   | tr   | 11.77 | 1.27 | 38.38 | 0.77 | 10.74 | tr   | tr   | tr   | tr   | tr   | <b>62.92</b> |
| <i>Baklava</i> (Phyllo pastry with nuts, Baklava)                   | tr                         | tr  | tr   | tr   | tr   | 6.63  | 0.77 | 32.68 | tr   | 9.86  | tr   | tr   | tr   | tr   | tr   | <b>49.93</b> |
| <i>Qatayef</i> (Dumpling filled with mixed nuts)                    | tr                         | tr  | tr   | tr   | tr   | 1.47  | 0.16 | 14.56 | 0.18 | 3.99  | 0.64 | 0.54 | 0.18 | tr   | 0.08 | <b>21.79</b> |
| <i>Samsamia</i> (Sesame bar)                                        | tr                         | tr  | tr   | tr   | tr   | tr    | tr   | 17.07 | tr   | 6.73  | tr   | tr   | tr   | tr   | tr   | <b>23.80</b> |

198

199

200 Table 1. (Continued)

201

| Food                                                           | Saturated Fatty Acid (SFA) |     |      |      |      |      |      |       |      |       |      |      |      |      |      | ΣSFA         |
|----------------------------------------------------------------|----------------------------|-----|------|------|------|------|------|-------|------|-------|------|------|------|------|------|--------------|
|                                                                | 4:0                        | 6:0 | 10:0 | 12:0 | 13:0 | 14:0 | 15:0 | 16:0  | 17:0 | 18:0  | 20:0 | 21:0 | 22:0 | 23:0 | 24:0 |              |
| <i>Khabeesa</i> (Cooked semolina with oil and sugar)           | tr                         | tr  | tr   | tr   | tr   | 0.38 | tr   | 12.17 | 0.44 | 2.72  | 0.48 | tr   | tr   | 1.94 | 0.13 | <b>18.26</b> |
| <i>Darabeel</i> (Rolled dough stuffed with sugar and cinnamon) | tr                         | tr  | tr   | tr   | tr   | 1.09 | 0.19 | 44.90 | 0.19 | 4.77  | 0.54 | tr   | tr   | tr   | tr   | <b>51.67</b> |
| <i>Zalabia</i> (Jalebi)                                        | tr                         | tr  | tr   | tr   | tr   | 1.13 | 0.06 | 40.87 | 0.23 | 5.11  | 0.34 | 0.10 | 0.06 | tr   | tr   | <b>47.91</b> |
| <i>Aseeda</i> (Cooked wheat flour with sugar)                  | tr                         | tr  | tr   | tr   | tr   | 2.23 | tr   | 22.53 | tr   | 3.50  | tr   | tr   | tr   | tr   | tr   | <b>28.26</b> |
| <i>Halwa</i> (Sweet wheat starch)                              | tr                         | tr  | tr   | tr   | 0.05 | 6.33 | 0.61 | 22.27 | 0.33 | 9.30  | 0.31 | 0.05 | 0.05 | tr   | 0.06 | <b>39.36</b> |
| <i>Baksam</i> (Rusk)                                           | tr                         | tr  | tr   | tr   | tr   | 0.85 | tr   | 32.48 | 0.46 | 4.22  | 0.61 | 1.82 | 1.12 | tr   | 0.47 | <b>42.03</b> |
| <b>Seed-based</b>                                              |                            |     |      |      |      |      |      |       |      |       |      |      |      |      |      |              |
| <i>Heso</i> (Garden cress and fenugreek seeds stew)            | tr                         | tr  | tr   | tr   | tr   | 0.19 | tr   | 10.88 | 0.09 | 2.51  | tr   | 0.05 | 0.38 | tr   | 0.15 | <b>14.25</b> |
| <i>Harda</i> (Soft sesame butter, Tahini)                      | tr                         | tr  | tr   | tr   | tr   | tr   | tr   | 10.12 | tr   | 6.80  | 0.72 | 0.06 | 0.20 | tr   | tr   | <b>17.89</b> |
| <b>Meat-based</b>                                              |                            |     |      |      |      |      |      |       |      |       |      |      |      |      |      |              |
| <i>Madhrooba</i> (Crushed wheat with lamb)                     | tr                         | tr  | tr   | tr   | tr   | 1.57 | 0.49 | 24.56 | 1.09 | 16.46 | 0.21 | 0.21 | tr   | tr   | tr   | <b>44.58</b> |
| <i>Arayes</i> (Pita bread stuffed with minced lamb)            | tr                         | tr  | tr   | tr   | tr   | 2.30 | 0.87 | 22.84 | 1.88 | 22.60 | 0.22 | 0.07 | 0.07 | tr   | tr   | <b>50.86</b> |
| <i>Hameesat Kabdah</i> (Fried lamb liver in tomato sauce)      | tr                         | tr  | tr   | tr   | tr   | 0.53 | 0.44 | 22.07 | 1.78 | 26.62 | 0.32 | 0.12 | 0.13 | tr   | 0.07 | <b>52.09</b> |
| <i>Keema</i> (Minced lamb fried with peas)                     | tr                         | tr  | tr   | tr   | tr   | 2.77 | 0.49 | 23.04 | 0.75 | 12.79 | 0.29 | 0.26 | 0.21 | tr   | 0.05 | <b>40.65</b> |
| <b>Sandwich</b>                                                |                            |     |      |      |      |      |      |       |      |       |      |      |      |      |      |              |
| Cheeseburger                                                   | tr                         | tr  | tr   | tr   | tr   | 3.60 | 0.67 | 28.68 | 0.87 | 11.10 | tr   | tr   | tr   | tr   | tr   | <b>44.91</b> |
| Chickenburger                                                  | tr                         | tr  | tr   | tr   | tr   | 2.40 | tr   | 27.62 | tr   | 9.41  | tr   | tr   | tr   | tr   | tr   | <b>39.43</b> |
| <b>Vegetable-based</b>                                         |                            |     |      |      |      |      |      |       |      |       |      |      |      |      |      |              |
| <i>Hameesat Mushroom</i> (Fried mushrooms in tomato sauce)     | tr                         | tr  | tr   | tr   | tr   | 0.07 | tr   | 12.13 | tr   | 2.03  | 0.43 | 0.07 | 0.21 | tr   | 0.10 | <b>15.03</b> |
| <i>Hameesat Fagae</i> (Fried truffles in tomato sauce)         | tr                         | tr  | tr   | tr   | tr   | 0.05 | tr   | 12.59 | tr   | 2.34  | 0.53 | 0.07 | 0.31 | tr   | 0.16 | <b>16.06</b> |
| <i>Marag Hawa</i> (Vegetable broth)                            | tr                         | tr  | tr   | tr   | tr   | 0.07 | tr   | 12.11 | tr   | 2.28  | 0.51 | 0.08 | 0.17 | tr   | 0.11 | <b>15.32</b> |

202

203

204

205 Table 1. (Continued)  
206

| Food                                                      | Monounsaturated Saturated Fatty Acid (MUFA) |      |      |      |                   |                   |      |      |      |              | Polyunsaturated Fatty Acid (PUFA) |                          |             |             |             |             |             | Trans Fatty Acid (TF) |             |
|-----------------------------------------------------------|---------------------------------------------|------|------|------|-------------------|-------------------|------|------|------|--------------|-----------------------------------|--------------------------|-------------|-------------|-------------|-------------|-------------|-----------------------|-------------|
|                                                           | 14:1                                        | 15:1 | 16:1 | 17:1 | 18:1 <sub>t</sub> | 18:1 <sub>c</sub> | 20:1 | 22:1 | 24:1 | ΣMUFA        | 18:2 <sub>t</sub>                 | 18:2 <sub>c</sub><br>n-6 | 18:3<br>n-3 | 20:4<br>n-6 | 20:5<br>n-3 | 22:2<br>n-3 | 22:6<br>n-3 |                       | ΣPUFA       |
| <b>Seafood</b>                                            |                                             |      |      |      |                   |                   |      |      |      |              |                                   |                          |             |             |             |             |             |                       |             |
| <i>Marag Samak Maleh</i> (Spanish mackerel broth)         | tr                                          | tr   | 4.13 | tr   | tr                | 20.99             | 1.93 | tr   | tr   | <b>27.05</b> | tr                                | 29.38                    | tr          | 1.23        | tr          | tr          | 7.93        | <b>38.54</b>          | <b>tr</b>   |
| <i>Kabab Rubyan</i> (Shrimps kebab)                       | tr                                          | tr   | 2.44 | 0.40 | tr                | 23.24             | 1.77 | tr   | tr   | <b>27.85</b> | tr                                | 33.49                    | tr          | 2.34        | tr          | tr          | 4.61        | <b>40.43</b>          | <b>tr</b>   |
| <i>Marag Rubyan</i> (Shrimps broth)                       | tr                                          | tr   | 0.76 | 0.20 | tr                | 26.64             | 1.34 | tr   | 0.07 | <b>29.01</b> | 0.08                              | 49.34                    | 0.06        | 0.07        | 0.09        | 1.72        | 1.32        | <b>52.68</b>          | <b>0.07</b> |
| <b>Soup</b>                                               |                                             |      |      |      |                   |                   |      |      |      |              |                                   |                          |             |             |             |             |             |                       |             |
| <i>Shorbat Shaereya</i> (Vermicelli soup)                 | tr                                          | tr   | tr   | tr   | tr                | 21.57             | 3.09 | tr   | tr   | <b>24.66</b> | tr                                | 45.78                    | tr          | tr          | tr          | tr          | tr          | <b>45.78</b>          | <b>tr</b>   |
| <i>Shorbat Dajaj</i> (Chicken soup)                       | 0.49                                        | 0.19 | 3.22 | tr   | tr                | 30.62             | 1.62 | 0.18 | 0.15 | <b>36.48</b> | 0.17                              | 14.63                    | 0.12        | tr          | tr          | tr          | 0.10        | <b>15.02</b>          | <b>0.17</b> |
| <i>Shorbat Harees</i> (Soup of peeled wheat with lamb)    | 0.41                                        | 0.34 | 1.16 | tr   | tr                | 36.31             | 0.89 | tr   | tr   | <b>39.10</b> | 0.24                              | 2.81                     | tr          | tr          | tr          | tr          | tr          | <b>3.05</b>           | <b>0.24</b> |
| <b>Cheese</b>                                             |                                             |      |      |      |                   |                   |      |      |      |              |                                   |                          |             |             |             |             |             |                       |             |
| Cream Cheese Spread, Regular                              | 0.75                                        | 0.32 | 1.57 | 0.32 | tr                | 26.32             | 0.98 | tr   | 1.33 | <b>31.60</b> | 0.17                              | 1.15                     | tr          | tr          | tr          | tr          | tr          | <b>1.32</b>           | <b>0.17</b> |
| Triangle Processed Cheese                                 | 0.90                                        | 0.33 | 1.83 | 0.35 | tr                | 27.61             | 0.87 | tr   | tr   | <b>31.88</b> | 0.28                              | 0.45                     | tr          | 0.06        | tr          | tr          | tr          | <b>0.79</b>           | <b>0.28</b> |
| “Al-Wafra” White Cheese, Low Fat                          | 0.90                                        | tr   | 3.30 | 0.40 | 0.30              | 29.53             | 0.57 | tr   | tr   | <b>35.00</b> | tr                                | 2.73                     | tr          | tr          | tr          | tr          | tr          | <b>2.73</b>           | <b>0.18</b> |
| <b>Rice-based</b>                                         |                                             |      |      |      |                   |                   |      |      |      |              |                                   |                          |             |             |             |             |             |                       |             |
| <i>Aish Muhammad</i> (Sweet rice)                         | tr                                          | tr   | tr   | tr   | tr                | 30.06             | 1.40 | tr   | tr   | <b>31.46</b> | tr                                | 52.66                    | tr          | tr          | tr          | tr          | tr          | <b>52.66</b>          | <b>tr</b>   |
| <i>Aish Khothra</i> (Rice with vegetables)                | tr                                          | tr   | 0.11 | tr   | tr                | 27.89             | 1.28 | tr   | tr   | <b>29.29</b> | tr                                | 55.56                    | 0.07        | tr          | tr          | tr          | tr          | <b>55.62</b>          | <b>tr</b>   |
| <i>Aish Faqae ma Laham</i> (Rice, truffle, lamb)          | tr                                          | tr   | 0.17 | 0.18 | tr                | 32.92             | 0.91 | tr   | 0.16 | <b>34.34</b> | 0.15                              | 43.95                    | tr          | tr          | 0.17        | tr          | tr          | <b>44.28</b>          | <b>0.15</b> |
| <i>Aish Bajella ma Shbent</i> (Rice, fava beans and dill) | tr                                          | tr   | 0.09 | tr   | 0.38              | 28.01             | 1.23 | tr   | tr   | <b>29.71</b> | tr                                | 53.52                    | 0.07        | tr          | tr          | tr          | tr          | <b>53.59</b>          | <b>0.07</b> |
| <i>Aish Tomat</i> (Rice with tomato)                      | tr                                          | tr   | tr   | tr   | tr                | 31.32             | tr   | tr   | tr   | <b>31.32</b> | tr                                | 30.52                    | tr          | tr          | tr          | tr          | tr          | <b>30.52</b>          | <b>tr</b>   |
| <i>Kushari</i> (Rice with macaroni and mung beans)        | tr                                          | tr   | 6.29 | tr   | tr                | 18.45             | 5.58 | tr   | tr   | <b>30.32</b> | tr                                | 33.48                    | tr          | tr          | tr          | tr          | tr          | <b>33.48</b>          | <b>tr</b>   |
| <b>Desserts</b>                                           |                                             |      |      |      |                   |                   |      |      |      |              |                                   |                          |             |             |             |             |             |                       |             |
| <i>Gherayba</i> (Shortbread cookie)                       | 0.70                                        | 0.17 | 0.37 | 0.20 | tr                | 30.43             | 0.85 | tr   | tr   | <b>32.72</b> | 0.09                              | 7.15                     | tr          | 0.06        | tr          | 0.05        | 0.05        | <b>7.39</b>           | <b>0.09</b> |
| <i>Knafah</i> (Shredded phyllo dough in sugar syrup)      | 0.83                                        | tr   | 1.67 | tr   | 1.53              | 27.24             | 0.60 | tr   | tr   | <b>31.87</b> | tr                                | 5.20                     | tr          | tr          | tr          | tr          | tr          | <b>5.20</b>           | <b>1.53</b> |
| <i>Baklava</i> (Phyllo pastry with nuts, Baklava)         | tr                                          | tr   | 1.20 | tr   | 1.50              | 34.18             | 0.73 | tr   | tr   | <b>37.61</b> | tr                                | 12.46                    | tr          | tr          | tr          | tr          | tr          | <b>12.46</b>          | <b>1.50</b> |
| <i>Qatayef</i> (Dumpling filled with mixed nuts)          | 0.11                                        | tr   | 0.26 | tr   | tr                | 28.53             | 1.02 | tr   | 0.20 | <b>30.12</b> | 0.07                              | 47.89                    | 0.05        | 0.08        | tr          | tr          | tr          | <b>48.09</b>          | <b>0.07</b> |
| <i>Samsamia</i> (Sesame bar)                              | tr                                          | tr   | tr   | tr   | tr                | 37.73             | tr   | tr   | tr   | <b>37.73</b> | tr                                | 38.47                    | tr          | tr          | tr          | tr          | tr          | <b>38.47</b>          | <b>tr</b>   |

207 Table 1. (Continued)

| Food                                                   | Monounsaturated Saturated Fatty Acid (MUFA) |      |      |      |                   |                   |      |      |      |              | Polyunsaturated Fatty Acid (PUFA) |                   |      |      |      |      |      | Trans Fat    |             |
|--------------------------------------------------------|---------------------------------------------|------|------|------|-------------------|-------------------|------|------|------|--------------|-----------------------------------|-------------------|------|------|------|------|------|--------------|-------------|
|                                                        | 14:1                                        | 15:1 | 16:1 | 17:1 | 18:1 <sub>t</sub> | 18:1 <sub>c</sub> | 20:1 | 22:1 | 24:1 | ΣMUFA        | 18:2 <sub>t</sub>                 | 18:2 <sub>c</sub> | 18:3 | 20:4 | 20:5 | 22:2 | 22:6 | ΣPUFA        | ΣTFA        |
|                                                        |                                             |      |      |      |                   |                   |      |      |      |              | n-6                               | n-3               | n-6  | n-3  | n-3  | n-3  |      |              |             |
| <i>Khabeesa</i> (Cooked semolina with oil and sugar)   | tr                                          | tr   | 0.30 | tr   | tr                | 27.48             | 1.55 | 0.57 | 0.31 | <b>30.21</b> | tr                                | 51.53             | tr   | tr   | tr   | tr   | tr   | <b>51.53</b> | <b>tr</b>   |
| <i>Darabeel</i> (Rolled dough stuffed with sugar)      | tr                                          | tr   | 0.18 | tr   | 0.27              | 35.88             | 0.80 | tr   | 0.14 | <b>37.27</b> | 0.16                              | 10.90             | tr   | tr   | tr   | tr   | tr   | <b>11.06</b> | <b>0.44</b> |
| <i>Zalabia</i> (Jalebi)                                | tr                                          | tr   | 0.18 | tr   | 0.25              | 39.35             | 0.34 | tr   | 2.78 | <b>42.90</b> | 0.15                              | 9.05              | tr   | tr   | tr   | tr   | tr   | <b>9.20</b>  | <b>0.40</b> |
| <i>Aseeda</i> (Cooked wheat flour with sugar)          | tr                                          | tr   | tr   | tr   | tr                | 16.99             | 5.13 | tr   | tr   | <b>22.13</b> | tr                                | 49.62             | tr   | tr   | tr   | tr   | tr   | <b>49.62</b> | <b>tr</b>   |
| <i>Halwa</i> (Sweet wheat starch)                      | 0.53                                        | 0.14 | 0.75 | 0.23 | tr                | 34.04             | 3.02 | tr   | tr   | <b>38.70</b> | 0.15                              | 21.50             | 0.33 | tr   | tr   | tr   | tr   | <b>21.97</b> | <b>0.15</b> |
| <i>Baksam</i> (Rusk)                                   | tr                                          | tr   | tr   | tr   | tr                | 30.20             | 2.26 | 0.96 | tr   | <b>33.43</b> | 0.65                              | 23.66             | 0.23 | tr   | tr   | tr   | tr   | <b>24.54</b> | <b>0.65</b> |
| <b>Seed-based</b>                                      |                                             |      |      |      |                   |                   |      |      |      |              |                                   |                   |      |      |      |      |      |              |             |
| <i>Heso</i> (Garden cress and fenugreek seeds stew)    | tr                                          | tr   | 0.12 | tr   | tr                | 28.86             | 9.96 | 0.12 | 0.24 | <b>39.29</b> | 0.20                              | 45.00             | 1.25 | tr   | tr   | tr   | tr   | <b>46.45</b> | <b>0.20</b> |
| <i>Harda</i> (Soft sesame butter, Tahini)              | 0.05                                        | tr   | 0.14 | 0.06 | tr                | 42.56             | 0.52 | tr   | tr   | <b>43.33</b> | tr                                | 38.80             | tr   | tr   | tr   | tr   | tr   | <b>38.80</b> | <b>tr</b>   |
| <b>Meat-based</b>                                      |                                             |      |      |      |                   |                   |      |      |      |              |                                   |                   |      |      |      |      |      |              |             |
| <i>Madhrooba</i> (Crushed wheat with lamb)             | 0.29                                        | tr   | 1.00 | 0.39 | tr                | 38.28             | 1.41 | tr   | tr   | <b>41.37</b> | 0.31                              | 13.74             | tr   | tr   | tr   | tr   | tr   | <b>14.05</b> | <b>0.31</b> |
| <i>Arayes</i> (Pita bread stuffed with minced lamb)    | 0.37                                        | 0.29 | 1.00 | 0.85 | 4.47              | 35.79             | 1.13 | tr   | tr   | <b>43.89</b> | 0.31                              | 4.93              | tr   | tr   | tr   | tr   | tr   | <b>5.24</b>  | <b>4.77</b> |
| <i>Hameesat Kabdah</i> (Fried lamb liver in sauce)     | 0.18                                        | 0.19 | 1.13 | 0.90 | tr                | 36.41             | 0.56 | tr   | tr   | <b>39.36</b> | 0.28                              | 8.19              | tr   | 0.06 | tr   | tr   | tr   | <b>8.54</b>  | <b>0.28</b> |
| <i>Keema</i> (Minced lamb fried with peas)             | 0.75                                        | 0.32 | 2.33 | 0.49 | 1.47              | 35.68             | 1.05 | tr   | tr   | <b>42.10</b> | 0.12                              | 16.93             | 0.12 | 0.05 | tr   | tr   | tr   | <b>17.23</b> | <b>1.55</b> |
| <b>Sandwich</b>                                        |                                             |      |      |      |                   |                   |      |      |      |              |                                   |                   |      |      |      |      |      |              |             |
| Cheeseburger                                           | 0.63                                        | tr   | 2.37 | 0.53 | 2.33              | 29.18             | 2.03 | tr   | tr   | <b>37.07</b> | tr                                | 17.44             | tr   | 0.57 | tr   | tr   | tr   | <b>18.01</b> | <b>2.33</b> |
| Chickenburger                                          | tr                                          | tr   | 0.80 | tr   | 1.37              | 30.49             | 2.43 | tr   | tr   | <b>35.09</b> | tr                                | 25.48             | tr   | tr   | tr   | tr   | tr   | <b>25.48</b> | <b>1.37</b> |
| <b>Vegetable-based</b>                                 |                                             |      |      |      |                   |                   |      |      |      |              |                                   |                   |      |      |      |      |      |              |             |
| <i>Hameesat Mushroom</i> (Fried mushroom in sauce)     | 0.08                                        | tr   | 0.16 | tr   | tr                | 26.88             | 1.17 | tr   | tr   | <b>28.28</b> | tr                                | 56.52             | 0.17 | tr   | tr   | tr   | tr   | <b>56.69</b> | <b>tr</b>   |
| <i>Hameesat Fagae</i> (Fried truffles in tomato sauce) | tr                                          | tr   | 0.19 | tr   | tr                | 28.49             | 1.01 | tr   | tr   | <b>29.68</b> | tr                                | 53.97             | 0.09 | 0.05 | 0.16 | tr   | tr   | <b>54.28</b> | <b>tr</b>   |
| <i>Marag Hawa</i> (Vegetable broth)                    | tr                                          | tr   | 0.11 | tr   | tr                | 27.84             | 1.60 | tr   | tr   | <b>29.54</b> | tr                                | 55.07             | 0.07 | tr   | tr   | tr   | tr   | <b>55.14</b> | <b>tr</b>   |

tr: trace (values for peaks &lt; 0.05%)

*t*: trans fatty acid; *c*: cis fatty acidΣTFA: 18:1<sub>t</sub>+18:2<sub>t</sub>

208 According to the joint Food and Agriculture Organization (FAO)/WHO [23] and FAO  
209 [24] reports, the SFAs with the most determinant effects on blood LDL cholesterol elevation  
210 are lauric (C12:0), myristic (C14:0), and to some extent palmitic (C16:0) acids, whereas  
211 stearic acid (C18:0) has been shown to reduce total blood cholesterol levels. Lauric acid was  
212 detected in trace amounts in all food samples (<0.05% of total fatty acids), whereas, C14:0  
213 proportion was low with values ranging between trace amounts (<0.05%) and 8.2% of total  
214 fatty acids, except for cheese dishes (10.70–13.58%) and *Knafah* (11.77%) (Table 1). C16:0  
215 was the most abundant SFA in 35 of 37 foods. The highest and lowest concentrations of  
216 C16:0, 12.02 and 0.01 g/100 g EP, were detected in cream cheese and *Shorbat Shaereya*  
217 (vermicelli soup), respectively (S2 Table). In contrast, the highest and lowest percentage of  
218 palmitic acid of the total fatty acids were identified in dessert *Darabeel* (rolled dough stuffed  
219 with sugar and cinnamon; 44.90%) and seed-based food *Harda* (10.12%), respectively. The  
220 C16:0 percent of the total fatty acids was predominant in cheese dishes (36.90–37.58%) and  
221 in the following desserts: *Baksam* (rusk; 32.48%), *Baklawa* (baklava; 32.68%), *Knafah*  
222 (38.38%), *Zalabia* (jalebi; 40.87%), and *Gherayba* (41.24%) (Table 1). Thus, we recommend  
223 that these foods be consumed in moderation or the butter and ghee used in desserts  
224 preparation can be substituted with unsaturated fatty acids oil. The dominance of SFA in the  
225 analyzed foods and of palmitic acid in SFA is consistent with earlier studies on similar  
226 groups of foods from Saudi Arabia [25].

## 227 **Monounsaturated fatty acids**

228 The highest concentration of MUFA (25.66 g/100 g EP) was demonstrated by *Harda*,  
229 followed by *Samsamia* (sesame bar; 14.07 g/100 g EP) and cream cheese (10.29 g/100 g EP)  
230 (S2 Table). MUFA was the most dominant type of fatty acids in only two food samples  
231 *Keema* (minced lamb with peas) and *Harda* (42.10 and 43.33%, respectively). Oleic acid  
232 (C18:1c) was the most dominant MUFA across all 37 food samples. The oleic acid

233 percentage of total fatty acids was the highest in *Harda* (42.56%), the major ingredient of this  
234 food is sesame seeds, known to be high in oleic acid [26].

### 235 **Polyunsaturated fatty acids**

236 PUFA reduces blood LDL cholesterol, but has an undesirable effect of also reducing  
237 HDL cholesterol [11]. As presented in Table 1, PUFA was the most dominant type of fatty  
238 acids in vegetable-based foods (54.28–56.69% of total fatty acids), rice-based foods  
239 (44.28–55.62% of total fatty acids), and seafood dishes (38.54–52.68% of total fatty acids).  
240 Among PUFA, the concentration of linoleic acid (C18:2c *n*-6) was the highest in all foods,  
241 with *Harda* (22.98 g/100 g EP) and *Samsamia* (14.35 g/100 g EP) containing the highest  
242 levels which were attributed to sesame seeds constituting the major ingredient in *Harda* and  
243 *Samsamia* recipes. Linoleic acid was the dominant fatty acid in 17 of the 37 foods, which is  
244 nutritionally desirable owing to its metabolism at the tissue level, producing hormone-like  
245 prostaglandins that aid in reducing blood pressure, preventing gastric ulcers, and relieving  
246 nasal congestion and asthma, as well as diminishing platelet aggregation, thus preventing  
247 CVD [27]. Linolenic (C18:3 *n*-3), eicosapentaenoic (C20:5 *n*-3), and docosadienoic (C22:2  
248 *n*-3) acids were detected in small quantities (<0.05 g/100 g EP) in all foods. Arachidonic  
249 (C20:4 *n*-6) and docosahexaenoic (DHA; C22:6 *n*-3) acids were detected in seafood dishes at  
250 concentrations of 0.001–0.09 and 0.02–0.51 g/100 g EP, respectively (S2 Table). The  
251 arachidonic acid and DHA percentage of total fatty acids detected in seafood dishes varied  
252 between traces–2.34 and traces–7.93%, respectively (Table 1). The availability of DHA in  
253 seafood dishes is in agreement with other studies [28, 29] pointed to the high levels of DHA  
254 in fish.

### 255 **Trans fatty acids**

256 Trans fats are commonly found in highly processed foods, although natural trans fats  
257 produced in animals and foods made from these animals (e.g. milk, meat products) may also

258 contain small amounts of these fats. TFA content investigated in the food samples ranged  
259 between traces and 0.45 g/100 g EP, all of which were in ready-made purchased foods and  
260 foods of animal origin. The highest TFA concentration (0.45 g/100 g EP) was in a  
261 meat-based food *Arayes*, followed by cheeseburger (0.36 g/100 g EP), and in desserts  
262 *Baklawa* (0.31 g/100 g EP) and *Knafah* (0.27 g/100 g EP) (S2 Table). The TFA percentage of  
263 total fatty acids for the same foods was the highest, with values of 4.78, 2.33, 1.50, and  
264 1.53%, respectively (Table 1). The high TFA content in *Arayes* and cheeseburger could be  
265 attributed to the major ingredient of both of these foods being lamb and beef, respectively;  
266 whereas in *Baklawa* and *Knafah*, it could be attributed to the use of butter in *Baklawa*, and  
267 butter and cheese in *Knafah*.

268 In 2017, Saudi Arabia; a Middle East country with similar lifestyles, dietary patterns,  
269 eating habits, nutrition-related health concerns, and nature of foods as the State of Kuwait;  
270 implemented 2% and 5% TFA limits for fats and all other foods, respectively [30]. In light of  
271 this fact, it is interesting to note that none of the foods analyzed in the present study had  
272 TFA >5% of the total fatty acids, whereas the meat-based foods *Arayes* and cheeseburger had  
273 TFA proportion of total fatty acids exceeding 2%.

274 Overall, TFA has no known health benefits. There is a common understanding that high  
275 consumption of TFA has negative health effects, and has been strongly associated with a high  
276 risk of CVD [24]. TFA has worse effects on blood cholesterol levels than SFA as it not only  
277 raises LDL cholesterol but also lowers HDL cholesterol.

## 278 **Cholesterol composition**

279 The cholesterol content of the investigated foods varied between 4.42 and  
280 454.79 mg/100 g EP of food (Table 2). Cholesterol was not detected in 19 foods, all of which  
281 contained no animal fat, the source of dietary cholesterol, detection limit was <0.05 mg/100  
282 g.

283

Table 2. Cholesterol composition given in means  $\pm$  SD (mg/100 g edible portion of food)

| Food                                                                |                    |
|---------------------------------------------------------------------|--------------------|
| <b>Seafood</b>                                                      |                    |
| <i>Marag Samak Maleh</i> (Spanish mackerel broth)                   | 86.75 $\pm$ 4.67   |
| <i>Kabab Rubyan</i> (Shrimps kebab)                                 | 359.17 $\pm$ 8.04  |
| <i>Marag Rubyan</i> (Shrimps broth)                                 | 212.58 $\pm$ 6.34  |
| <b>Soup</b>                                                         |                    |
| <i>Shorbat Shaereya</i> (Vermicelli soup)                           | ND                 |
| <i>Shorbat Dajaj</i> (Chicken soup)                                 | 103.47 $\pm$ 5.56  |
| <i>Shorbat Harees</i> (Soup of peeled wheat with lamb)              | 23.80 $\pm$ 0.64   |
| <b>Cheese</b>                                                       |                    |
| Cream Cheese Spread, Regular                                        | 169.16 $\pm$ 5.67  |
| Triangle Processed Cheese                                           | 145.16 $\pm$ 6.67  |
| “Al-Wafra” White Cheese, Low Fat                                    | 97.13 $\pm$ 4.65   |
| <b>Rice-based</b>                                                   |                    |
| <i>Aish Muhammar</i> (Sweet rice)                                   | ND                 |
| <i>Aish Khothra</i> (Rice with vegetables)                          | ND                 |
| <i>Aish Fagae ma Laham</i> (Rice, truffle with lamb)                | 15.18 $\pm$ 2.46   |
| <i>Aish Bajella ma Shbent</i> (Rice with green fava beans and dill) | ND                 |
| <i>Aish Tomat</i> (Rice with tomato)                                | ND                 |
| <i>Kushari</i> (Rice with macaroni and mung beans)                  | ND                 |
| <b>Desserts</b>                                                     |                    |
| <i>Gherayba</i> (Shortbread cookie)                                 | 10.10 $\pm$ 1.49   |
| <i>Knafah</i> (Shredded phyllo dough and cheese in sugar syrup)     | 56.60 $\pm$ 4.63   |
| <i>Baklava</i> (Phyllo pastry with nuts, Baklava)                   | 4.42 $\pm$ 0.37    |
| <i>Qatayef</i> (Dumpling filled with mixed nuts)                    | 15.32 $\pm$ 1.75   |
| <i>Samsamia</i> (Sesame bar)                                        | ND                 |
| <i>Khabeesa</i> (Cooked semolina with oil and sugar)                | ND                 |
| <i>Darabeel</i> (Rolled dough stuffed with sugar and cinnamon)      | ND                 |
| <i>Zalabia</i> (Jalebi)                                             | ND                 |
| <i>Aseeda</i> (Cooked wheat flour with sugar)                       | ND                 |
| <i>Halwa</i> (Sweet wheat starch)                                   | 33.21 $\pm$ 1.25   |
| <i>Baksam</i> (Rusk)                                                | ND                 |
| <b>Seed-based</b>                                                   |                    |
| <i>Heso</i> (Garden cress and fenugreek seeds stew)                 | ND                 |
| <i>Harda</i> (Soft sesame butter, Tahini)                           | ND                 |
| <b>Meat-based</b>                                                   |                    |
| <i>Madhrooba</i> (Crushed wheat with lamb)                          | 19.78 $\pm$ 0.65   |
| <i>Arayes</i> (Pita bread stuffed with minced lamb)                 | 67.85 $\pm$ 2.46   |
| <i>Hameesat Kabdah</i> (Fried lamb liver in tomato sauce)           | 454.79 $\pm$ 31.01 |
| <i>Keema</i> (Minced lamb fried with peas)                          | 72.42 $\pm$ 2.97   |
| <b>Sandwich</b>                                                     |                    |
| Cheeseburger                                                        | 123.42 $\pm$ 1.71  |
| Chickenburger                                                       | 68.00 $\pm$ 7.77   |
| <b>Vegetable-based</b>                                              |                    |
| <i>Hameesat Mushroom</i> (Fried mushrooms in tomato sauce)          | ND                 |
| <i>Hameesat Fagae</i> (Fried truffles in tomato sauce)              | ND                 |
| <i>Marag Hawa</i> (Vegetable broth)                                 | ND                 |

284

SD: standard deviation

285

ND: Not detected (detection limit <0.05 mg/100 g edible portion of food)

286



287 The highest cholesterol content of 454.79 mg/100 g was found in *Hameesat Kabdah*.  
288 This food is based on lamb liver that is known to be rich in cholesterol with 386 mg/100 g EP  
289 [31]. The high cholesterol concentrations in *Kabab Rubyan* (shrimp kebab; 359.17 mg/100 g)  
290 and *Marag Rubyan* (shrimp broth; 212.58 mg/100 g) are attributed to shrimp being the major  
291 ingredient in both food recipes. On a fresh weight basis, shrimp contain a high cholesterol  
292 concentration of 161 mg/100 g [32]. Cheese dishes (97.13–169.16 mg/100 g), cheeseburger  
293 based on beef (123.42 mg/100 g), *Shorbat Dajaj* based on chicken (103.47 mg/100 g), and  
294 *Samak Maleh* based on fish (86.75 mg/100 g) contained relatively high cholesterol levels.  
295 Among desserts, five dishes contained relatively low levels of cholesterol, *Baklawah* (4.42 mg/  
296 100 g), *Gherayba* (10.10 mg/ 100 g), *Qatayef* (dumpling filled with mixed nuts; 15.32 mg/  
297 100 g), *Halwa* (sweet wheat starch; 33.21 mg/ 100g) with the highest concentration of 56.60  
298 mg/100 g in *Knafah*, that could be attributed to cheese and butter in the recipe. Other foods  
299 containing lower cholesterol levels were *Keema*, *Arayes*, *Madhrooba* (crushed wheat with  
300 lamb), and *Aish Fagae ma laham* (rice with truffles and lamb), all of which contained varying  
301 amounts of lamb. The cholesterol levels in meat-based foods analyzed in this study were  
302 higher than those reported for similar Saudi Arabian and Omani meat-based foods [25, 33].

### 303 **Fatty acid quality**

304 Foods with low PUFA to SFA (P/S) ratios have been considered as undesirable in the  
305 diet, as they induce elevated levels of blood cholesterol, which contribute to an increased risk  
306 of CVD and cancers. In order to maintain a healthy cardiovascular status, P/S values higher  
307 than 0.45 are desirable [13, 34]. As presented in Table 3, the P/S ratios for meat-based foods  
308 (0.10–0.42), cheese dishes (0.01–0.04), desserts (*Gherayba* 0.12, *Knafah* 0.08, *Baklawah*  
309 0.25, *Darabeel* 0.21, and *Zalabia* 0.19), cheeseburger (0.40), soup (*Shorbat Harees* (soup of  
310 peeled wheat with lamb) 0.05, and *Shorbat Dajaj* (chicken soup) 0.31) were all <0.45, which  
311 is considered nutritionally unhealthy. The remaining foods had higher P/S ratios (>0.45) and

312

Table 3. Fatty acid n-3/n-6 and polyunsaturated/saturated fatty acid ratio

| <b>Food</b>                                                         | <b>n-3/n-6</b> | <b>P/S</b> |
|---------------------------------------------------------------------|----------------|------------|
| <b>Seafood</b>                                                      |                |            |
| <i>Marag Samak Maleh</i> (Spanish mackerel broth)                   | 0.26           | 1.12       |
| <i>Kabab Rubyan</i> (Shrimps kebab)                                 | 0.13           | 1.27       |
| <i>Marag Rubyan</i> (Shrimps broth)                                 | 0.06           | 2.88       |
| <b>Soup</b>                                                         |                |            |
| <i>Shorbat Shaereya</i> (Vermicelli Soup)                           | 0.00           | 1.55       |
| <i>Shorbat Dajaj</i> (Chicken soup)                                 | 0.02           | 0.31       |
| <i>Shorbat Harees</i> (Soup of peeled wheat with lamb)              | 0.00           | 0.05       |
| <b>Cheese</b>                                                       |                |            |
| Cream Cheese Spread, Regular                                        | 0.00           | 0.02       |
| Triangle Processed Cheese                                           | 0.00           | 0.01       |
| “Al-Wafra” White Cheese, Low Fat                                    | 0.00           | 0.04       |
| <b>Rice-based</b>                                                   |                |            |
| <i>Aish Muhammar</i> (Sweet rice)                                   | 0.00           | 3.32       |
| <i>Aish Khothra</i> (Rice with vegetables)                          | 0.00           | 3.68       |
| <i>Aish Fagae ma Laham</i> (Rice, truffle with lamb)                | 0.00           | 2.07       |
| <i>Aish Bajella ma Shbent</i> (Rice with green fava beans and dill) | 0.00           | 3.21       |
| <i>Aish Tomat</i> (Rice with tomato)                                | 0.00           | 0.80       |
| <i>Kushari</i> (Rice with macaroni and mung beans)                  | 0.00           | 0.92       |
| <b>Desserts</b>                                                     |                |            |
| <i>Gherayba</i> (Shortbread cookie)                                 | 0.01           | 0.12       |
| <i>Knafah</i> (Shredded phyllo dough and cheese in sugar syrup)     | 0.00           | 0.08       |
| <i>Baklava</i> (Phyllo pastry with nuts, Baklava)                   | 0.00           | 0.25       |
| <i>Qatayef</i> (Dumpling filled with mixed nuts)                    | 0.00           | 2.21       |
| <i>Samsamia</i> (Sesame bar)                                        | 0.00           | 1.62       |
| <i>Khabeesa</i> (Cooked semolina with oil and sugar)                | 0.00           | 2.82       |
| <i>Darabeel</i> (Rolled dough stuffed with sugar and cinnamon)      | 0.00           | 0.21       |
| <i>Zalabia</i> (Jalebi)                                             | 0.00           | 0.19       |
| <i>Aseeda</i> (Cooked wheat flour with sugar)                       | 0.00           | 1.76       |
| <i>Halwa</i> (Sweet wheat starch)                                   | 0.02           | 0.56       |
| <i>Baksam</i> (Rusk)                                                | 0.01           | 0.58       |
| <b>Seed-based</b>                                                   |                |            |
| <i>Heso</i> (Garden cress and fenugreek seeds stew)                 | 0.03           | 3.26       |
| <i>Harda</i> (Soft sesame butter, Tahini)                           | 0.00           | 2.17       |
| <b>Meat-based</b>                                                   |                |            |
| <i>Madhrooba</i> (Crushed wheat with lamb)                          | 0.00           | 0.32       |
| <i>Arayes</i> (Pita bread stuffed with minced lamb)                 | 0.00           | 0.10       |
| <i>Hameesat Kabdah</i> (Fried lamb liver in tomato sauce)           | 0.00           | 0.16       |
| <i>Keema</i> (Minced lamb fried with peas)                          | 0.01           | 0.42       |
| <b>Sandwich</b>                                                     |                |            |
| Cheeseburger                                                        | 0.00           | 0.40       |
| Chickenburger                                                       | 0.00           | 0.65       |
| <b>Vegetable-based</b>                                              |                |            |
| <i>Hameesat Mushroom</i> (Fried mushrooms in tomato sauce)          | 0.00           | 3.77       |
| <i>Hameesat Fagae</i> (Fried truffles in tomato sauce)              | 0.00           | 3.38       |
| <i>Marag Hawa</i> (Vegetable broth)                                 | 0.00           | 3.60       |

313 n-3 fatty acid: 18:3, 20:5, 22:2, and 22:6

314 n-6 fatty acid: 18:2 and 20:4

315 P/S: polyunsaturated/saturated fatty acid ratio

316 can thus be said to have good fat content for human nutrition concerning the balance between  
317 PUFA and SFA.

318 A balanced n-3/n-6 fatty acid ratio has positive effects on decreasing the risk of CVD and  
319 cancers [35]. The n-3/n-6 fatty acid ratios below 4.0 were recommended by the Department  
320 of Health of the United Kingdom [36]. The n-3/n-6 ratio of all foods examined in this study  
321 (0.00 and 0.26) were within the recommendations (Table 3). Although, recent studies by  
322 Marventano et al. and FAO/WHO [23, 37] have suggested that there might not be any impact  
323 of n-3/n-6 fatty acid ratio on human health.

324 An atherogenic and/or thrombogenic food is one that has the potential to induce platelet  
325 aggregation, which might stimulate CVD, and is thus considered less nutritionally beneficial.  
326 The SFAs, C12:0, C14:0, and C16:0 are considered atherogenic and thrombogenic as many  
327 studies have shown that they have a cholesterol-raising effect that may induce platelets  
328 aggregation [38]. Thus, foods with higher concentrations of these fatty acids have higher  
329 atherogenic (AI) and thrombogenic indices (TI).

330 AI and TI values were calculated in the present study, these values indicate the potency  
331 of foods to stimulate platelet aggregation, and lower values indicate better nutritional quality  
332 of food. AI and TI values were the highest for cheese dishes, and ranged from 2.11 to 2.84,  
333 and 3.18 to 4.03; respectively (Table 4). The AI and TI values were variable for desserts, AI  
334 values ranged from 0.17 in *Khabeesa* and 2.31 in *Knafah*, while TI values ranged from 0.37  
335 in *Khabeesa* and 3.29 in *Knafah*. The high AI and TI values for *Knafah* were attributed to the  
336 presence of around 50% C14:0 and C16:0 SFA. Soup was the third highest food group with  
337 AI ranging from 0.36–1.12, and TI from 0.66–2.61. AI ranged between 0.61–0.78 and TI  
338 between 1.30–1.58 for sandwiches, 0.51–0.66 and 1.29–2.07 for meat-based food, 0.18–0.55  
339 and 0.32–0.58 for seafood, and 0.14–0.70 and 0.33–1.13 for rice-based food. A low AI of  
340 0.15 was recorded for all vegetable-based foods, as well as low TI values varied between 0.33

341 Table 4. Fatty acid quality of 37 local foods of the State of Kuwait using atherogenic, thrombogenic and  
342 hypocholesterolemic/hypercholesterolemic indices.

| Food                                                                | AI   | TI   | H/H  |
|---------------------------------------------------------------------|------|------|------|
| <b>Seafood</b>                                                      |      |      |      |
| <i>Marag Samak Maleh</i> (Spanish mackerel broth)                   | 0.55 | 0.58 | 2.25 |
| <i>Kabab Rubyan</i> (Shrimps kebab)                                 | 0.34 | 0.52 | 3.25 |
| <i>Marag Rubyan</i> (Shrimps broth)                                 | 0.18 | 0.32 | 5.87 |
| <b>Soup</b>                                                         |      |      |      |
| <i>Shorbat Shaereya</i> (Vermicelli soup)                           | 0.36 | 0.66 | 3.39 |
| <i>Shorbat Dajaj</i> (Chicken soup)                                 | 1.12 | 1.77 | 1.22 |
| <i>Shorbat Harees</i> (Soup of peeled wheat with lamb)              | 0.78 | 2.61 | 1.47 |
| <b>Cheese</b>                                                       |      |      |      |
| Cream Cheese Spread, Regular                                        | 2.73 | 3.96 | 0.55 |
| Triangle Processed Cheese                                           | 2.84 | 4.03 | 0.55 |
| “Al-Wafra” White Cheese, Low Fat                                    | 2.11 | 3.18 | 0.68 |
| <b>Rice-based</b>                                                   |      |      |      |
| <i>Aish Muhammar</i> (Sweet rice)                                   | 0.15 | 0.36 | 6.51 |
| <i>Aish Khothra</i> (Rice with vegetables)                          | 0.14 | 0.33 | 6.99 |
| <i>Aish Fagae ma Laham</i> (Rice, truffle with lamb)                | 0.19 | 0.50 | 5.35 |
| <i>Aish Bajella ma Shbent</i> (Rice with green fava beans and dill) | 0.17 | 0.38 | 6.08 |
| <i>Aish Tomat</i> (Rice with tomato)                                | 0.47 | 1.13 | 2.14 |
| <i>Kushari</i> (Rice with macaroni and mung beans)                  | 0.70 | 0.92 | 2.57 |
| <b>Desserts</b>                                                     |      |      |      |
| <i>Gherayba</i> (Shortbread cookie)                                 | 1.85 | 2.88 | 0.76 |
| <i>Knafah</i> (Shredded phyllo dough and cheese in sugar syrup)     | 2.31 | 3.29 | 0.65 |
| <i>Baklava</i> (Phyllo pastry with nuts, Baklava)                   | 1.18 | 1.96 | 1.19 |
| <i>Qatayef</i> (Dumpling filled with mixed nuts)                    | 0.26 | 0.51 | 4.78 |
| <i>Samsamia</i> (Sesame bar)                                        | 0.22 | 0.62 | 4.46 |
| <i>Khabeesa</i> (Cooked semolina with oil and sugar)                | 0.17 | 0.37 | 6.30 |
| <i>Darabeel</i> (Rolled dough stuffed with sugar and cinnamon)      | 1.02 | 2.11 | 1.02 |
| <i>Zalabia</i> (Jalebi)                                             | 0.87 | 1.81 | 1.15 |
| <i>Aseeda</i> (Cooked wheat flour with sugar)                       | 0.44 | 0.79 | 2.69 |
| <i>Halwa</i> (Sweet wheat starch)                                   | 0.79 | 1.21 | 1.95 |
| <i>Baksam</i> (Rusk)                                                | 0.63 | 1.28 | 1.62 |
| <b>Seed-based</b>                                                   |      |      |      |
| <i>Heso</i> (Garden cress and fenugreek seeds stew)                 | 0.14 | 0.29 | 6.79 |
| <i>Harda</i> (Soft sesame butter, Tahini)                           | 0.12 | 0.41 | 8.04 |
| <b>Meat-based</b>                                                   |      |      |      |
| <i>Madhrooba</i> (Crushed wheat with lamb)                          | 0.56 | 1.55 | 1.99 |
| <i>Arayes</i> (Pita bread stuffed with minced lamb)                 | 0.66 | 1.96 | 1.62 |
| <i>Hameesat Kabdah</i> (Fried lamb liver in tomato sauce)           | 0.51 | 2.07 | 1.98 |
| <i>Keema</i> (Minced lamb fried with peas)                          | 0.58 | 1.29 | 2.04 |
| <b>Sandwich</b>                                                     |      |      |      |
| Cheeseburger                                                        | 0.78 | 1.58 | 1.46 |
| Chickenburger                                                       | 0.61 | 1.30 | 1.86 |
| <b>Vegetable-based</b>                                              |      |      |      |
| <i>Hameesat Mushroom</i> (Fried mushrooms in tomato sauce)          | 0.15 | 0.33 | 6.85 |
| <i>Hameesat Fagae</i> (Fried truffles in tomato sauce)              | 0.15 | 0.35 | 6.55 |
| <i>Marag Hawa</i> (Vegetable broth)                                 | 0.15 | 0.34 | 6.81 |

343 AI: Atherogenic Index, TI: Thrombogenic Index, H/H:Hypocholesterolemic/Hypercholesterolemic Index.

344

345 and 0.35. AI for seed-based *Harda* and *Heso* (garden cress and fenugreek seeds stew) was the  
346 lowest among all foods investigated in this study, with values of 0.12 and 0.14, respectively;  
347 and the lowest TI among all foods was 0.29 for *Heso*. This is attributed to low C14:0 and  
348 C16:0 SFA and high MUFA and PUFA levels in *Harda* and *Heso*.

349 Contrary to AI and TI, foods with higher H/H indices are more nutritionally desirable  
350 [39]. The highest H/H (8.04) was recorded for *Harda*. The H/H range for the different foods  
351 examined in this study from the highest to lowest values were: rice-based foods (2.14–6.99),  
352 vegetable-based foods (6.55–6.85), *Heso* (6.79), seafood (2.25–5.87), desserts (0.65–4.78,  
353 except *Khabeesa* with H/H 6.29), soup (1.22–3.39), meat-based foods (1.62–2.04),  
354 sandwiches (1.46–1.86), and cheese dishes with the lowest H/H values (0.55–0.68). The AI,  
355 TI, and H/H values may indicate that the consumption of seed-based, vegetable-based,  
356 rice-based, and seafood dishes analyzed in the present study is potentially healthier, in terms  
357 of the fatty acid quality, for humans than that of cheese, desserts, sandwiches, and meat-based  
358 foods.

## 359 **Conclusions**

360 The results of this study revealed a high percentage of unsaturated fatty acids,  
361 predominantly oleic and linoleic acids, and favorable indices such as P/S, AI, TI, and H/H for  
362 seafood dishes, rice-based, seed-based, and vegetable-based foods, suggesting that these  
363 foods can be consumed as part of a healthy diet. The cholesterol content was high in two  
364 shrimp-based seafood dishes; hence, it is preferable that these foods be consumed with  
365 caution by people with high blood cholesterol levels. The TFA content was low in all foods  
366 examined, at levels that do not represent any known significant health risk. Interestingly, all  
367 foods showed n-3/n-6 fatty acid ratios within the nutritional recommendations. The highest  
368 SFA content (predominantly C16:0 and C14:0) was recorded in cheese and some ready-made  
369 desserts including *Knafah*, *Gherayba*, *Baklawa*, and *Zalabia*. It is worth mentioning that

370 these desserts are also popular among the Middle East and Mediterranean populations. The  
371 same desserts showed low fatty acid quality based on their P/S, AI, TI, and H/H values; thus,  
372 they should be consumed in moderation or other strategies should be adopted, such as  
373 modifying the composition of these foods, by for example substituting ghee or butter with  
374 vegetable oil. Published data on foods with similar structure could not be compared with our  
375 data, since other studies reported fatty acid data on a dry weight basis. The fatty acid and  
376 cholesterol data obtained in the present study can be compiled to national food composition  
377 tables and incorporated in international databases such the United States Department of  
378 Agriculture (USDA) Nutrient Database for Standard Reference and EuroFIR FoodEXplorer  
379 to fill in missing data on fatty acids and cholesterol composition of local foods. Furthermore,  
380 data of the present study could be used in epidemiological and nutrition-health related studies  
381 aim at assessing population fatty acid nutritional status, and hence studying the associations  
382 between dietary fatty acids and the etiology of CVD and/or other nutrition-related diseases in  
383 humans.

## 384 **Supplementary material**

385 S1 Table. Detailed ingredients for 37 local Kuwaiti foods.

386 S2 Table. Fatty acid composition (g/100 g EP) for 37 local Kuwaiti foods.

## 387 **Acknowledgments**

388 The authors gratefully acknowledge the Ministry of Health of the State of Kuwait (MOH)  
389 for their financial support, and the Management of Kuwait Institute for Scientific Research  
390 (KISR) for their support and encouragement.

## 391 **Author contributions**

392 **Hanan A. Al-Amiri:** Conceptualization, Validation, Data Analysis, Visualization,  
393 Supervision, Project Administration, Funding acquisition, Writing-Original Draft,  
394 Writing-Reviewing & Editing  
395 **Nisar Ahmed, Tahani Al-Sharrah:** Methodology, Investigation, Resources.

## 396 **References**

- 397 1. Michas G, Micha R, Zampelas A. Dietary fats and cardiovascular disease: putting  
398 together the pieces of a complicated puzzle. *Atherosclerosis*. 2014;234:320-8.  
399 <https://doi.org/10.1016/j.atherosclerosis.2014.03.013>
- 400 2. Jakobsen MU, O'Reilly EJ, Heitmann BL, Pereira MA, Bälter K, Fraser GE, et al. Major  
401 types of dietary fat and risk of coronary heart disease: a pooled analysis of 11 cohort  
402 studies. *Am J Clin Nutr*. 2009; 89:1425-32. <https://doi.org/10.3945/ajcn.2008.27124>
- 403 3. World Health Organization [Internet]. Noncommunicable diseases [cited 2018].  
404 Available from:  
405 <https://www.who.int/news-room/fact-sheets/detail/noncommunicable-diseases/>
- 406 4. He K. Fish, long-chain omega-3 polyunsaturated fatty acids and prevention of  
407 cardiovascular disease-eat fish or take fish oil supplement? *Prog Cardiovasc Dis*. 2009;  
408 52(2): 95-114. <https://doi.org/10.1016/j.pcad.2009.06.003>
- 409 5. Assmann G, Schulte H. Relation of high-density lipoprotein cholesterol and triglycerides  
410 to incidence of atherosclerotic coronary artery disease (the PROCAM experience). *Am J*  
411 *Cardiol*. 1992;70(7):7733-7. [https://doi.org/10.1016/0002-9149\(92\)90550-1](https://doi.org/10.1016/0002-9149(92)90550-1)
- 412 6. De Lorgeril M, Salen P. New insights into the health effects of dietary saturated and  
413 omega-6 and omega-3 polyunsaturated fatty acids. *BMC Med*. 2012;10, 50.  
414 <https://doi.org/10.1186/1741-7015-10-50>
- 415 7. Astrup A, Dyerberg J, Elwood P, Hermansen K, Hu FB, Jakobsen MU, et al. The role of  
416 reducing intakes of saturated fat in the prevention of cardiovascular disease: where does

- 417 the evidence stand in 2010? *Am J Clin Nutr.* 2011;93:684-8.  
418 <https://doi.org/10.3945/ajcn.110.004622>
- 419 8. Murry CE, Jennings RB, Reimer KA. New insights into potential mechanisms of  
420 ischemic preconditioning. *Circulation.* 1991;84:442-5. [https://doi:](https://doi.org/10.1161/01.cir.84.1.442)  
421 [10.1161/01.cir.84.1.442](https://doi.org/10.1161/01.cir.84.1.442)
- 422 9. Mozaffarian D, Katan MB, Ascherio A, Stampfer MJ, Willett WC. Trans fatty acids and  
423 cardiovascular disease. *New Eng J Med.* 2006;354(15):1601-13. [http://doi:](http://doi.org/10.1056/NEJMra054035)  
424 [10.1056/NEJMra054035](http://doi.org/10.1056/NEJMra054035)
- 425 10. Brouwer IA, Wanders AJ, Katan MB. Trans fatty acids and cardiovascular health:  
426 Research completed? *Eur J Clin Nutr.* 2013;67(5):541-7.  
427 <https://doi.org/10.1038/ejcn.2013.43>
- 428 11. Ramsden CE, Hibbeln JR, Majchrzak SF, Davis JM. N-6 fatty acid-specific and mixed  
429 polyunsaturated dietary interventions have different effects on CHD risk: a meta-analysis  
430 of randomized controlled trials. *Br J Nutr.* 2010;104:1586-600.  
431 <https://doi.org/10.1017/S0007114510004010>
- 432 12. Grundy SM. Monounsaturated fatty acids and cholesterol metabolism: Implications for  
433 dietary recommendations. *J Nutr.* 1989;119:529-33. <https://doi.org/10.1093/jn/119.4.529>
- 434 13. Wood JD, Richardson RI, Nute GR, Fisher AV, Campo MM, Kasapidou E, et al. Effect  
435 of fatty acids on meat quality: a review. *Meat Sci.* 2003;66:21-32.  
436 [https://doi.org/10.1016/S0309-1740\(03\)00022-6](https://doi.org/10.1016/S0309-1740(03)00022-6)
- 437 14. Michikawa M. The role of cholesterol in pathogenesis of Alzheimer's disease: dual  
438 metabolic interaction between amyloid beta-protein and cholesterol. *Mol Neurobiol.* 2003;  
439 27:1-12. <https://doi.org/10.1385/MN:27:1:1>
- 440 15. Association of Official Analytical Chemists. Official Methods of Analysis, 17th Ed.  
441 Washington (DC): The Association; 2002.



- 442 16. Folch J, Lees M, Sloane Stanley GH. A simple method for the isolation and purification  
443 of total lipids from animal tissues. *J Biol Chem.* 1957;226:497-509.  
444 <https://www.jbc.org/content/226/1/497.long>
- 445 17. Segura J, Lopez-Bote C J. A laboratory efficient method for intramuscular fat analysis.  
446 *Food Chem.* 2014;145:821-5.
- 447 18. American Oil Chemists' Society. Official Method Ce 2–66, Preparation of Methyl Esters  
448 of Fatty Acids. Champaign, IL: The Society; 2000.
- 449 19. Paul AA, Southgate DAT. McCance and Windowson's, The composition of Foods.  
450 London: Her Majesty's Stationary Office; 1978.
- 451 20. Naeemi ED, Ahmad N, Al-Sharrah TK, Behbahani M. Rapid and simple methods for  
452 determination of cholesterol in processed food. *J AOAC Int.* 1995;78(6):1522-4.  
453 <https://doi.org/10.1093/jaoac/78.6.1522>
- 454 21. Ulbricht TLV, Southgate DAT. Coronary Heart Disease: Seven Dietary Factors. *Lancet.*  
455 1991;338:985-92. [https://doi.org/10.1016/0140-6736\(91\)91846-M](https://doi.org/10.1016/0140-6736(91)91846-M)
- 456 22. Testi S, Bonaldo A, Gatta P, Badiani A. Nutritional traits of dorsal and ventral fillets from  
457 three farmed fish species. *Food Chem.* 2006;98:104-11.  
458 <https://doi.org/10.1016/j.foodchem.2005.05.053>
- 459 23. Joint FAO/WHO Expert Consultation on Fats and Fatty Acids in Human Nutrition.  
460 Interim Summary of Conclusions and Dietary Recommendations on Total Fat & Fatty  
461 Acids. Geneva: WHO; 2008.  
462 [https://www.who.int/nutrition/topics/FFA\\_interim\\_recommendations/en/](https://www.who.int/nutrition/topics/FFA_interim_recommendations/en/)
- 463 24. Food and Agriculture Organization of the United Nations (FAO). Fats and fatty acids in  
464 human nutrition: Report of an expert consultation. Geneva: FAO; 2010;91:1-166.  
465 <http://www.fao.org/3/i1953e/i1953e00.pdf>

- 466 25. Sawaya WN, Al-Jebrin A, Salji JP, Ayaz M, Khalil J. Cholesterol contents and fatty acid  
467 composition of selected Saudi Arabian dishes. *Nutr Rep Int.* 1985;31(3):593-600.
- 468 26. United States Department of Agriculture, Agricultural Research Service [Internet]. USDA  
469 Nutrient Database for Standard Reference, Release 18. Available from:  
470 <https://fdc.nal.usda.gov/fdc-app.html#/food-details/170152/nutrients>
- 471 27. Bhattacharya A, Banu J, Rahman M, Causey J, Fernandes G. Biological effects of  
472 conjugated linoleic acids in health and disease. *J Nutr Biochem.* 2006;17:789-810.  
473 <https://doi.org/10.1016/j.jnutbio.2006.02.009>
- 474 28. Riera-Heredia N, Lutfi E, Gutiérrez J, Navarro I, Capilla E. Fatty acids from fish or  
475 vegetable oils promote the adipogenic fate of mesenchymal stem cells derived from  
476 gilthead sea bream bone potentially through different pathways. *PLoS ONE.* 2019;14:  
477 e0215926. <https://doi.org/10.1371/journal.pone.0215926>
- 478 29. Pike IH, Andrew J. Fish oil: production and use now and in the future. *Lipid Technol.*  
479 2010;22:59-61. <https://doi.org/10.1002/lite.201000003>
- 480 30. World Health Organization [Internet]. Policies to eliminate industrially produced trans fat  
481 [cited 2019]. Available from:  
482 <https://apps.who.int/iris/bitstream/handle/10665/331302/WHO-NMH-NHD-18.5-eng.pdf/>
- 483 31. U.S. Department of Agriculture, Agricultural Research Service [Internet]. USDA Nutrient  
484 Database for Standard Reference, Release 18. Available from:  
485 <https://fdc.nal.usda.gov/fdc-app.html#/food-details/172615/nutrients>
- 486 32. U.S. Department of Agriculture, Agricultural Research Service [Internet]. USDA Nutrient  
487 Database for Standard Reference, Release 18. Available from:  
488 <https://fdc.nal.usda.gov/fdc-app.html#/food-details/175179/nutrients/>
- 489 33. Musaiger AO, Ahmed MA, Rao MV. Chemical composition of some local dishes of  
490 Oman. *Food Chem.* 1989;61:17-22. [https://doi.org/10.1016/S0308-8146\(97\)00148-9](https://doi.org/10.1016/S0308-8146(97)00148-9)

- 491 34. Ospina-E JC, Sierra-C A, Ochoa O, Pérez-Álvarez J, Fernández-López J. Substitution of  
492 saturated fat in processed meat products: A review. *Crit Rev Food Sci Nutr*.  
493 2012;52(2):113-22. <https://doi.org/10.1080/10408398.2010.493978>
- 494 35. Simopoulos AP. The importance of the ratio of omega-6/omega-3 essential fatty acids.  
495 *Biomed Pharmacother*. 2002;56:365-79. [https://doi.org/10.1016/S0753-3322\(02\)00253-6](https://doi.org/10.1016/S0753-3322(02)00253-6)
- 496 36. Department of Health of the United Kingdom. Nutritional Aspects of Cardiovascular  
497 Disease: Report of the Health and Social Subjects. London: Her Majesty's Stationery  
498 Office; 1994;46:37-46.
- 499 37. Marventano S, Kolacz P, Castellano S, Galvano F, Buscemi S, Mistretta A, et al. A  
500 review of recent evidence in human studies of n-3 and n-6 PUFA intake on  
501 cardiovascular disease, cancer, and depressive disorders: does the ratio really matter? *Int*  
502 *J Food Sci Nutr*. 2015;66:611-22. <https://doi.org/10.3109/09637486.2015.1077790>
- 503 38. Krauss RM, Deckelbaum RJ, Ernst N, Fisher E, Howard BV, Knopp RH, et al. Dietary  
504 guidelines for healthy American adults: A statement for health professionals from the  
505 Nutrition Committee, American Heart Association. *Circulation*. 1996;94:1795-1800.  
506 <https://doi.org/10.1161/01.CIR.94.7.1795>
- 507 39. Sasyte V, Grashorn MA, Klementaviciute J, Viliene V, Raceviciute-Stupeliene  
508 A, Gruzauskas R, et al. Effect of extruded full-fat rapeseed on egg quality in laying hens.  
509 *Eur Poult Sci*. 2017;81:1-15.  
510 [https://www.european-poultry-science.com/Effect-of-extruded-full-fat-rapeseed-on-egg-q  
511 uality-in-laying-hens,QUIEPTU1NzU5OTgmTUIEPTE2MTAxNA.html](https://www.european-poultry-science.com/Effect-of-extruded-full-fat-rapeseed-on-egg-quality-in-laying-hens,QUIEPTU1NzU5OTgmTUIEPTE2MTAxNA.html)

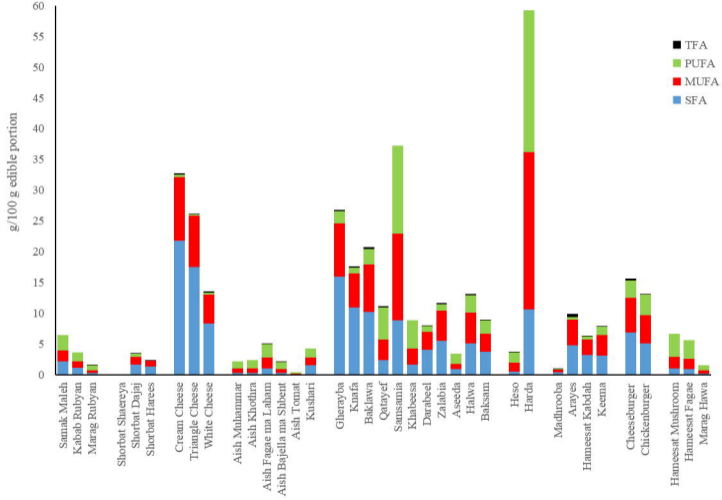

Source: https://www.medrxiv.org/content/medrxiv/early/2020/11/20/2020.11.18.20233999.full.pdf
